# Supplementary material for: Provision of obstetrics and gynaecology services during the COVID‐19 pandemic: a survey of junior doctors in the UK National Health Service
Source: PubMed Central journal article supplement (PMC7283977; doi:10.1111/1471-0528.16313), 2020-05-27
Supplement: BJO-127-1123-s028.pdf [file BJO-127-1123-s028.pdf]

**Appendix S1.** Questionnaire on the provision of obstetrics and gynaecology services in the NHS response during the acute phase of the COVID-19 pandemic.

| Question                                                                                                              | Yes / No | Comments |
|-----------------------------------------------------------------------------------------------------------------------|----------|----------|
| <b>Training and support</b>                                                                                           |          |          |
| Have you carried out any COVID training drills for obstetric and gynaecological emergencies?                          |          |          |
| Have you been face fit tested for a FFP3 or equivalent mask?                                                          |          |          |
| Have you received training in 2 people donning and doffing of PPE?                                                    |          |          |
| Have you received specific training on the care for a woman with COVID?                                               |          |          |
| <b>Labour Ward</b>                                                                                                    |          |          |
| Do you have a dedicated COVID operating theatre for obstetric emergencies ?                                           |          |          |
| Do you have access to PPE on labour ward?                                                                             |          |          |
| Has there been a clear protocol for management of suspected and confirmed COVID patients on labour ward in your unit? |          |          |
| Have there been any planned changes in the number of induction of labour and/or elective caesarean sections?          |          |          |
| <b>Antenatal and postnatal Care</b>                                                                                   |          |          |
| Did you start providing ANC service over the phone/videoconferencing?                                                 |          |          |
| Has there been a planned reduction in attendance to ANC?                                                              |          |          |
| Have there been any changes to antenatal screening pathways at your unit?                                             |          |          |
| Has there been clear protocol to speed up in-patient discharge postnatally?                                           |          |          |
| Are there dedicated bays or areas to care for women with suspected or confirmed COVID?                                |          |          |
| <b>Benign gynaecology</b>                                                                                             |          |          |
| Has the unit stopped all elective work including urogynaecology and fertility service?                                |          |          |

|                                                                                                                                                      |  |  |
|------------------------------------------------------------------------------------------------------------------------------------------------------|--|--|
| Has there been protocols to avoid the use of emergency laparoscopy in women with suspected or confirmed COVID?                                       |  |  |
| Has there been protocol to offer medical management of miscarriage as a 1st line treatment developed?                                                |  |  |
| Has there been protocol to offer medical management of confirmed ectopic pregnancy as a 1st line treatment developed?                                |  |  |
| <b>Oncology gynaecology</b>                                                                                                                          |  |  |
| Have you changed your Two Week Wait referral pathway and/or services?                                                                                |  |  |
| Have you reduced your oncology theatre lists?                                                                                                        |  |  |
| Have you moved Gynae-Oncology operating to a different site or trust?                                                                                |  |  |
| Have you changed the ward where Gynae-oncology patients are cared for post op?                                                                       |  |  |
| <b>General</b>                                                                                                                                       |  |  |
| As a junior doctor in O+G, do you feel well supported facing this pandemic?                                                                          |  |  |
|                                                                                                                                                      |  |  |
| How do you rate your confidence in how your unit is managing this pandemic on a scale from 1-9?<br>1 being no confidence and 9 being very confident. |  |  |
| How do you rate your anxiety at present on a scale from 1-9?<br>1 being severe anxiety and 9 being no anxiety.                                       |  |  |
